# Supplementary material for: The Polar Legionella Icm/Dot T4SS Establishes Distinct Contact Sites with the Pathogen Vacuole Membrane
Source: PubMed Central journal article supplement (PMC8510526; doi:10.1128/mbio.02180-21), 2021-10-12
Supplement: mbio.02180-21-sf003.pdf [file mbio.02180-21-sf003.pdf]

**Figure S3**

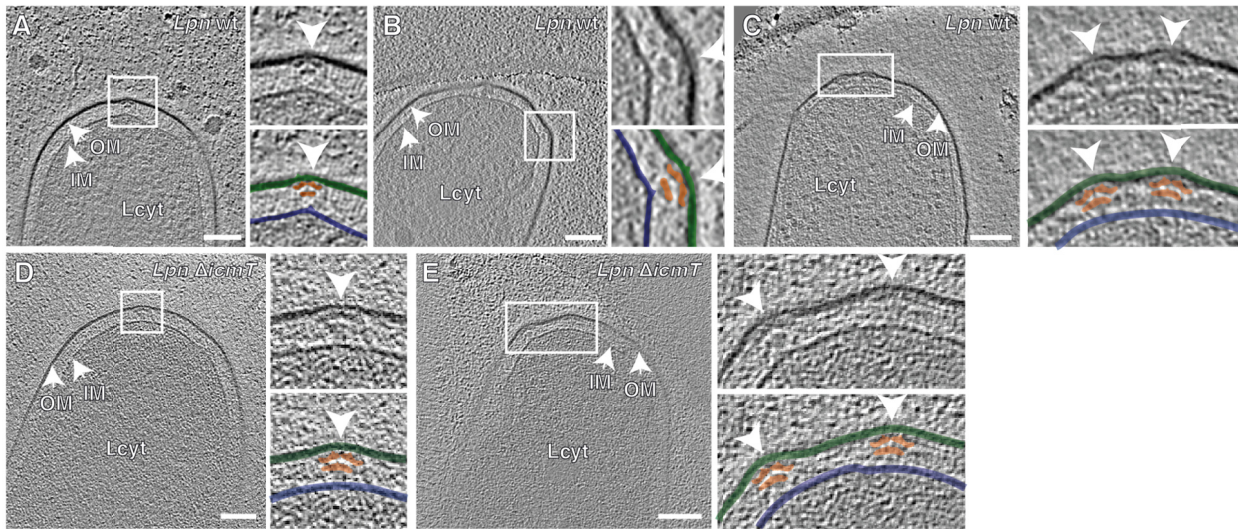

**Figure S3. The *L. pneumophila* Icm/Dot T4SS is located at bacterial cell poles.** Cryotomograms indicating that the Icm/Dot T4SSs (white arrowheads, orange) localized to the poles of *L. pneumophila* (A-C) wild-type as well as (D, E)  $\Delta icmT$  mutant bacteria. Secretion systems in both strains adopted the characteristic “Wi-Fi”-like structure of the T4SS. Multiple secretion systems can be distributed along a cell pole. Shown are 8 nm slices of cryotomograms. OM/green, outer membrane; IM/blue, inner membrane; Lcyt, *L. pneumophila* cytoplasm; scale bars, 100 nm.
