# Supplementary material for: The Polar Legionella Icm/Dot T4SS Establishes Distinct Contact Sites with the Pathogen Vacuole Membrane
Source: PubMed Central journal article supplement (PMC8510526; doi:10.1128/mbio.02180-21), 2021-10-12
Supplement: mbio.02180-21-sf005.pdf [file mbio.02180-21-sf005.pdf]

Figure S5

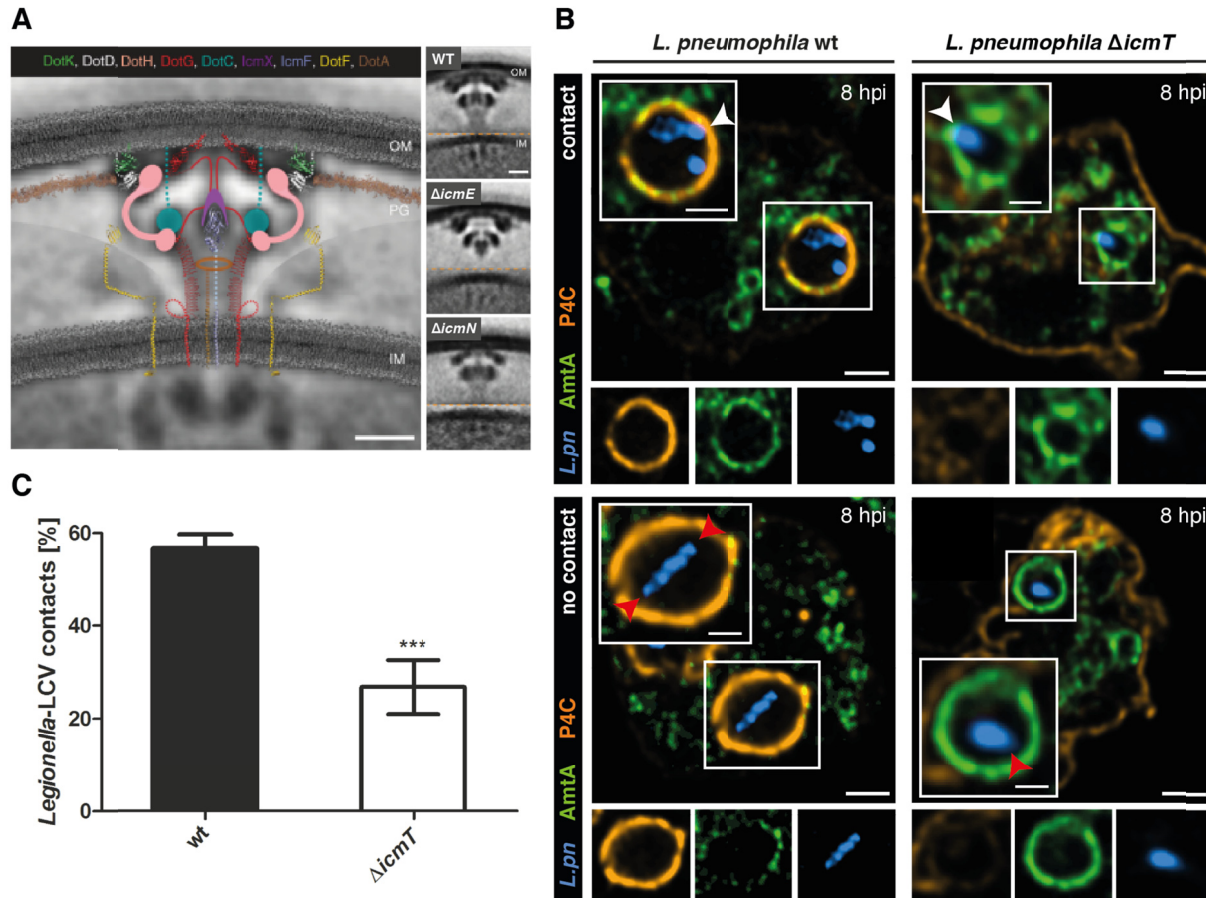

**Figure S5. T4SS structure and activity influence cell-pole tethering at late infection stages.** (A) Position of subunits of the T4SS and sub-tomogram averages of T4SS particles from *L. pneumophila* wild-type,  $\Delta icmE$ , and  $\Delta icmN$  mutant bacteria. Images taken from Ghosal *et al.* (2019) *Nat Microbiol* 4: 1173-1182. Scale bars, 10 nm. (B) Representative fluorescence micrographs of *D. discoideum* Ax3 producing P4C-mCherry (pWS032) and AmtA-GFP (pHK121), infected (MOI 5; 8 h) with mCerulean-producing *L. pneumophila* wild-type and  $\Delta icmT$  mutant bacteria harboring plasmid pNP99. Examples are shown for contact between bacteria and the LCV membrane (top, white arrowheads) or no contact (bottom, red arrowheads). Scale bars: 2  $\mu$ m (overviews), 1  $\mu$ m (inserts). (C) Quantification of data shown in (B) ( $n^{\text{events}}=60$ ). Data are represented as mean  $\pm$  SD from three independent experiments (\*\*\*)  $P<0.001$ ).
